# Supplementary material for: Synergistic apoptosis of human gastric cancer cells by bortezomib and TRAIL
Source: PubMed Central journal article supplement (PMC6818207; doi:10.7150/ijms.34398), 2019-09-20
Supplement: ijmsv16p1412s1.pdf [file ijmsv16p1412s1.pdf]

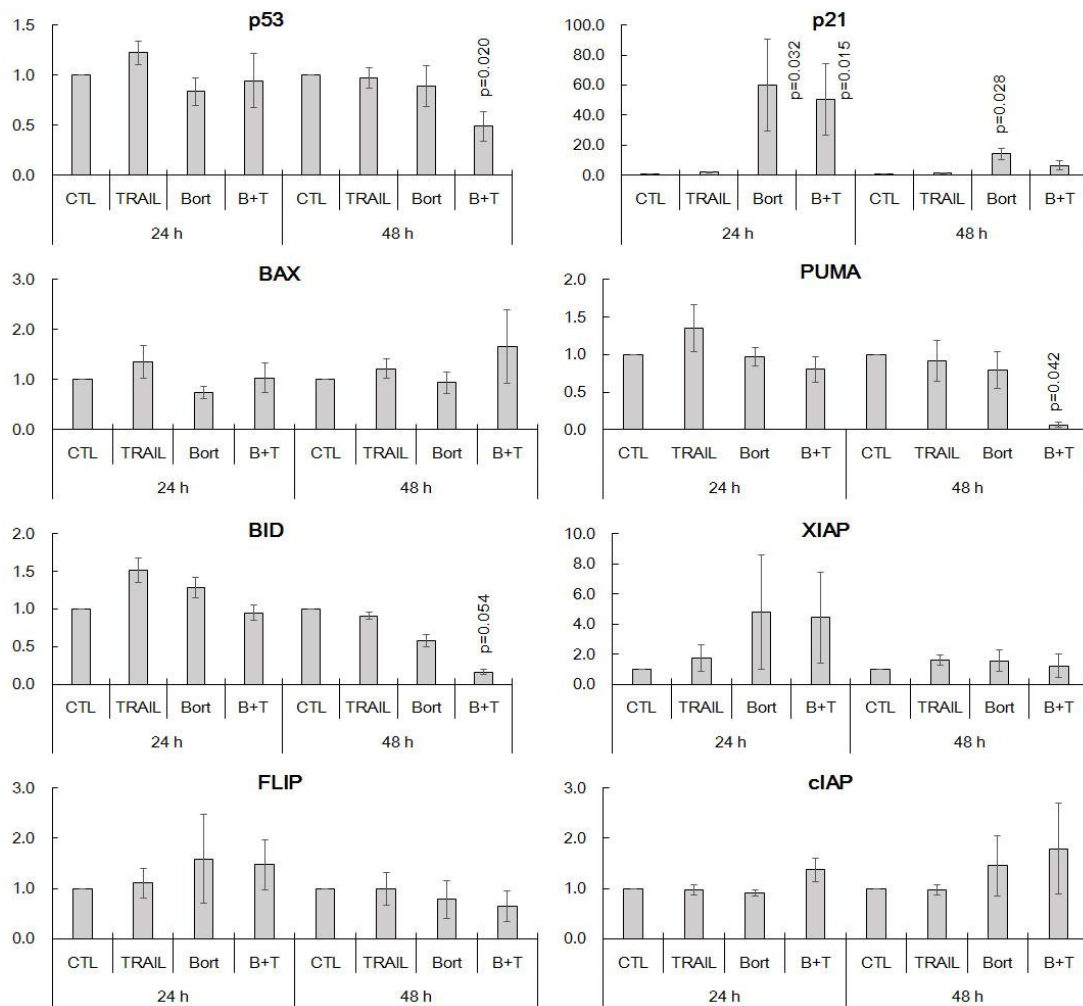

**Supplemental Figure 1. Quantification of western blot results of Fig. 4A.** Specific protein bands detected by western blots were quantified with Image J software and normalized against  $\beta$ -Actin. Data shown are means  $\pm$  SE of more than triple experiments except duplicated Puma. Vertical axis represents fold changes of the normalized intensity against 24 h and 48 h controls, respectively. Statistical analysis was performed with Student's t-test between untreated control vs. each treat group. Bort for bortezomib; B + T for bortezomib plus TRAIL.

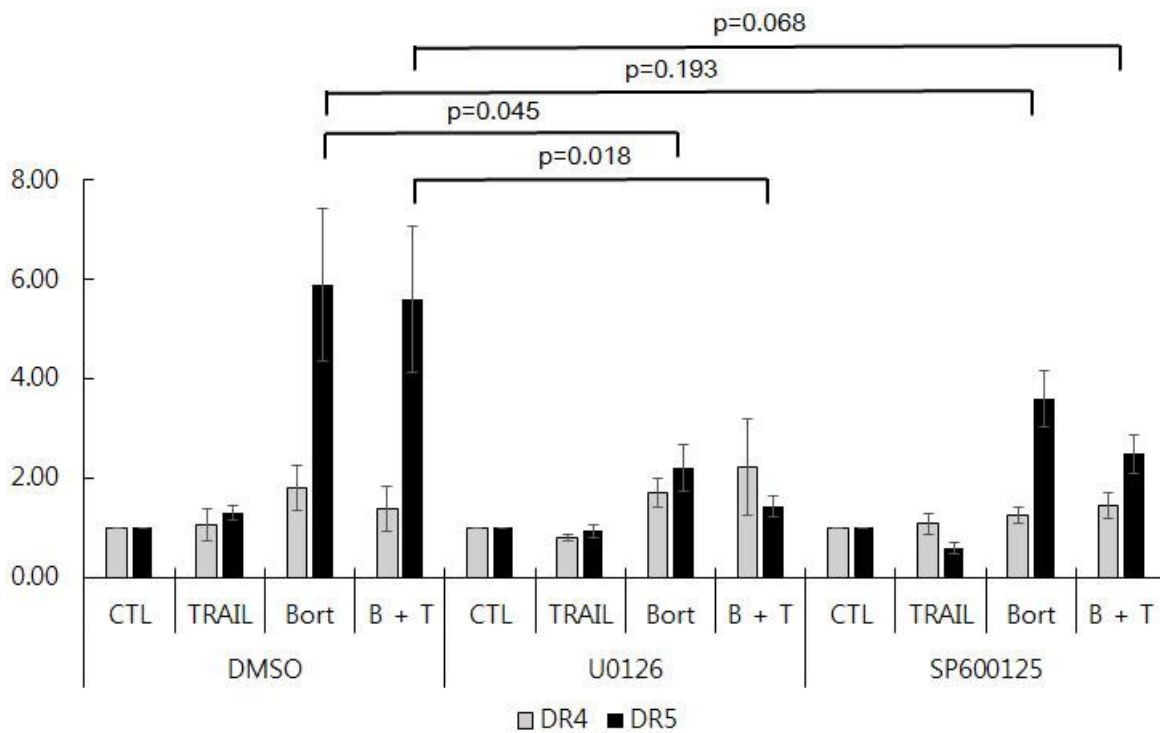

**Supplemental Figure 2. Quantification of western blot results of Fig. 6C.** Specific protein bands detected by western blots were quantified with Image J software and normalized against  $\beta$ -Actin. Data shown are means  $\pm$  SE of more than quadruple experiments. Vertical axis represents fold changes of the normalized intensity against drug controls, respectively. Statistical analysis was performed with Student's t-test between untreated control vs. U0126 or SP600125-treated group independently. Bort for bortezomib; B + T for bortezomib plus TRAIL.
